## Correction

# Correction: The N-terminus of *Paenibacillus larvae* C3larvinA modulates catalytic efficiency

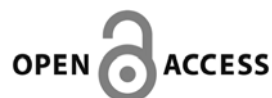

The authors of the original article “The N-terminus of *Paenibacillus larvae* C3larvinA modulates catalytic efficiency” (*Biosci Rep* (2021) 41(1), DOI: 10.1042/BSR20203727) would like to correct Figure 5 of their article. During figure preparation for the submission of their manuscript, there had been an inadvertent duplication of Panel E which resulted in the replacement of Panel F in Figure 5. The authors clarify that Panels E and F were different variants of the C3larvinA toxin that produced identical phenotypes when infecting host macrophages. They further state that this duplication of panel E in Figure 5 does not change the conclusion of the results in Figure 5 or in the paper. The correct Figure 5 is present in this Correction. The authors apologise for any inconvenience caused by this error.

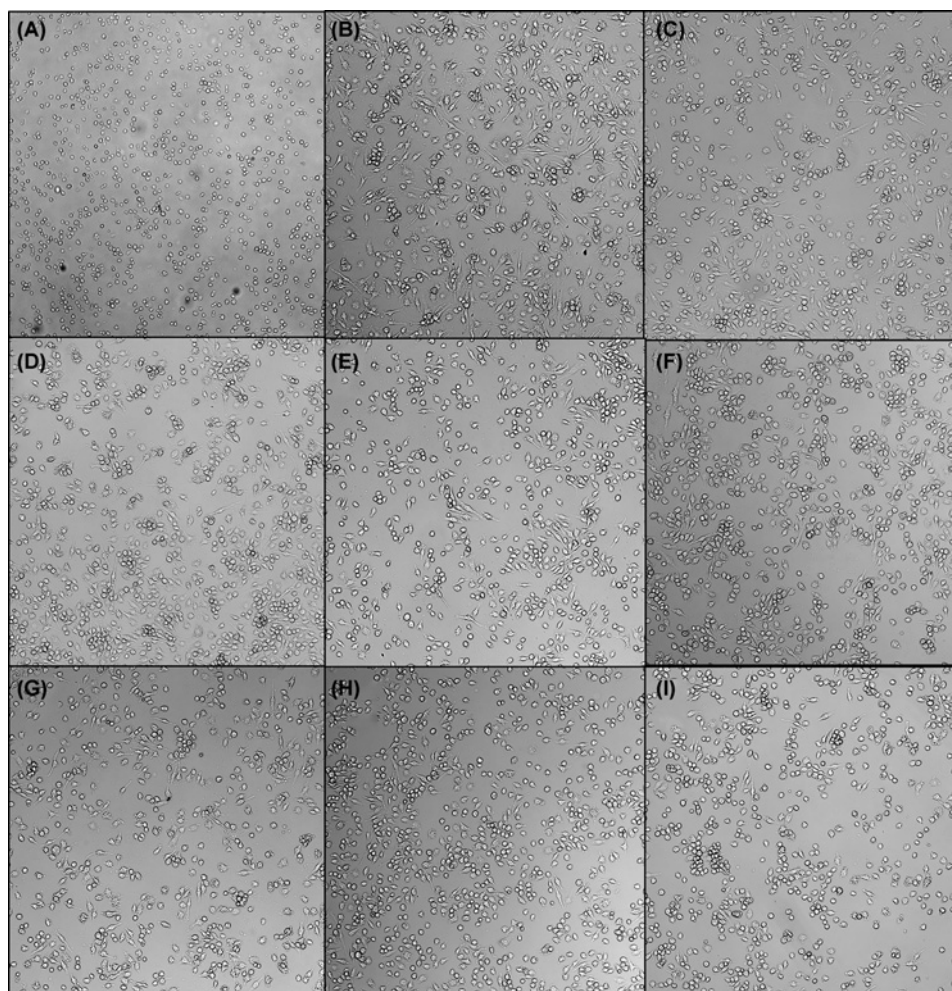

**Figure 5. C3larvinA N-terminal deletions have varying effects on the morphology of macrophage cells**  
J774A.1 mouse macrophage cells were treated with 300 nM toxin and incubated for 20 h at a cell density of 37500 cells/well. Effects to morphology were less dramatic in the larger N-terminal deletions. (A) Buffer control; (B) C3larvinA (full length); (C)  $\Delta Y2-A21$ ; (D)  $\Delta Y2-D23$ ; (E)  $\Delta Y2-K25$ ; (F)  $\Delta Y2-D27$ ; (G)  $\Delta Y2-A30$ ; (H)  $\Delta Y2-K33$ ; (I)  $\Delta Y2-W34$ .

Version of Record published:  
27 April 2021
